# Supplementary material
Source: publisher site journal article supplement (https://study.sagepub.com/sites/default/files/15%20Bloomberg%203e%20Appendix%20X.pdf)
Supplement: Supplementary file 1 [file 15%20Bloomberg%203e%20Appendix%20X.pdf]

## Appendix X. Data Summary Table: Finding 4

|       | Name    | Facilitators        |            |               |         |
|-------|---------|---------------------|------------|---------------|---------|
|       |         | Personal Attributes | Colleagues | Other Faculty | Advisor |
| 1     | Mollie  | X                   |            |               |         |
| 2     | Hank    | X                   |            |               |         |
| 3     | Morris  | X                   |            |               |         |
| 4     | Debbie  | X                   |            | X             |         |
| 5     | Doris   | X                   |            | X             |         |
| 6     | Anthony | X                   | X          |               |         |
| 7     | Anne    | X                   | X          |               |         |
| 8     | Brent   |                     | X          |               |         |
| 9     | Angela  | X                   |            |               |         |
| 10    | Jane    |                     | X          |               | X       |
| 11    | Brad    |                     | X          |               |         |
| 12    | Dexter  | X                   |            |               |         |
| 13    | Frankie |                     | X          |               |         |
| 14    | Sally   | X                   |            |               |         |
| 15    | Shana   | X                   |            | X             |         |
| 16    | Lin     | X                   |            |               |         |
| 17    | Carin   | X                   | X          |               |         |
| 18    | Fay     | X                   |            |               | X       |
| 19    | Connie  | X                   |            |               |         |
| 20    | Julia   |                     | X          |               |         |
| TOTAL | 20      | 15 (75%)            | 8 (40%)    | 3 (15%)       | 2 (10%) |
